# Supplementary figures and images for: A toolkit for studying cell surface shedding of diverse transmembrane receptors
Source: eLife journal article supplement (doi:10.7554/elife.46983), 2019-06-07

**A.**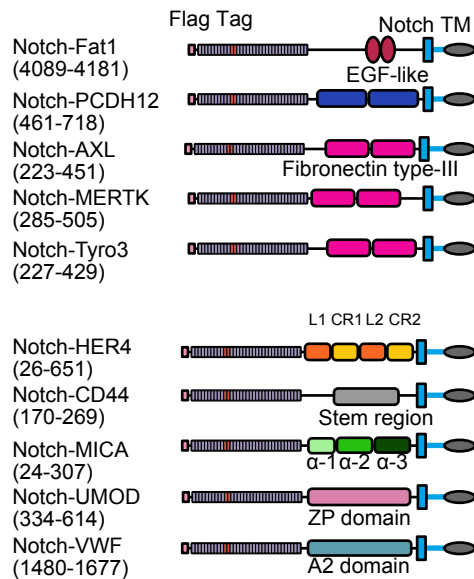**B.****RTKs**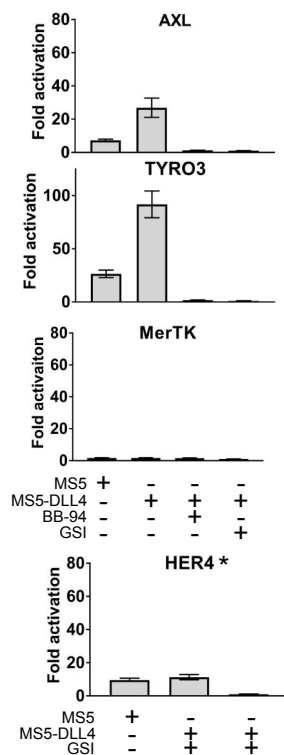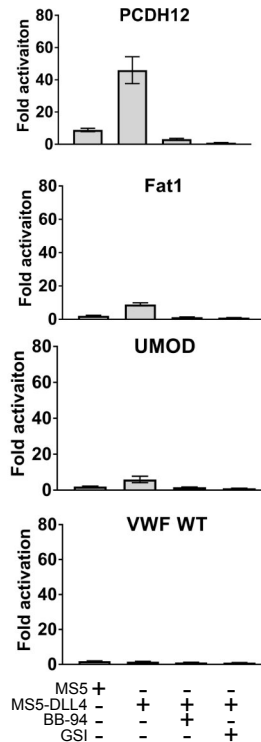**C.**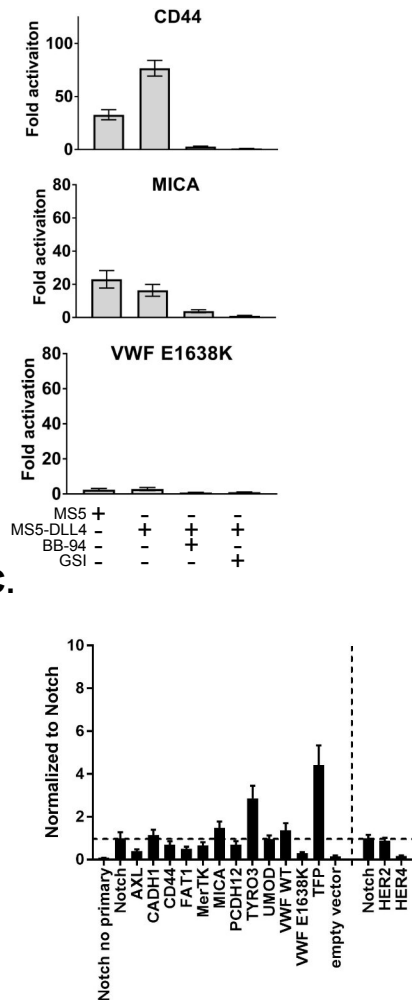

Supplement: supp [file elife-46983-supp-v1.zip]

**A.**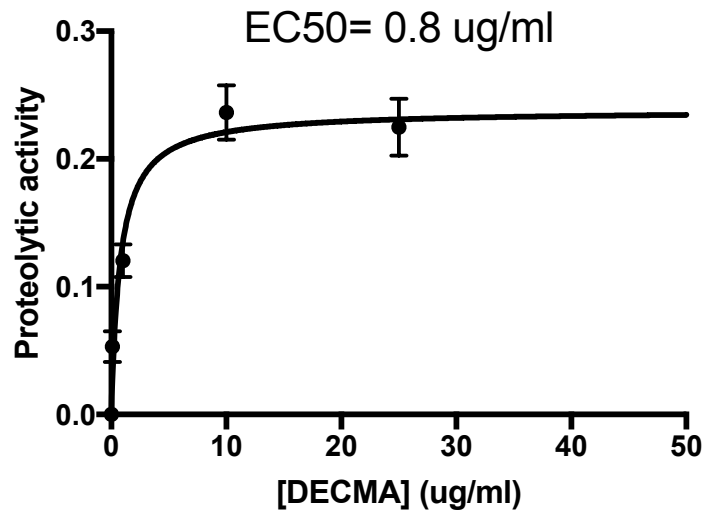**B.**

Effects of protease inhibitors on  
DECMA-1 induced CTF2/3 band intensity

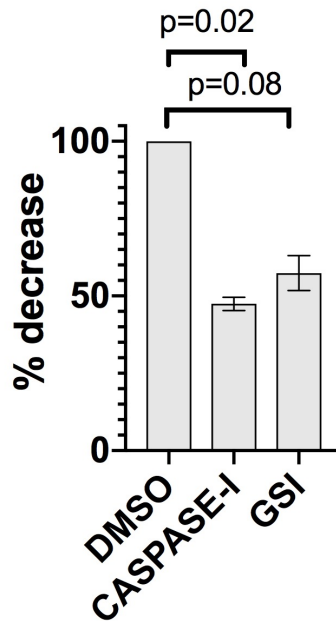

Supplement: supp [file elife-46983-supp-v1.zip]

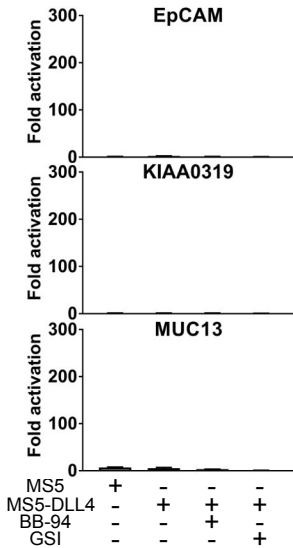

Supplement: supp [file elife-46983-supp-v1.zip]
